# Supplementary material for: Assessing private solutions to collective action problems in a 34-nation study
Source: Research Square preprint supplement (doi:10.21203/rs.3.rs-4924647/v1), 2024-11-15
Supplement: Supplementary file 1 [file e1d22fbd3c196d5af0c54ac5.pdf]

## **Supplementary Information**

### **Table of Contents:**

#### **1. Supplementary Methods**

- a. [Table S1. Cultural and Economic Factors](#)
- b. [Table S2. Participant Payments](#)
- c. [Table S3. Sample Sizes by Country](#)
- d. [Table S4. Participant Demographics by Country](#)
- e. [Table S5. Demographic Variables and Private and Public Solution Adoption](#)
- f. [Instructions for Experimenters](#)
- g. [Instruction for Participants](#)

#### **2. Supplementary Tables**

##### **a. Statistical Details: Private Solution Adoption**

- i. [Table S6. Private Solution Adoption by Wealth](#)
- ii. [Table S7. Private Solution Adoption: Mixed-Effects Model](#)
- iii. [Table S8. Private Solution Adoption by Country, Wealth, and Treatment](#)
- iv. [Table S9. Private Solution Adoption by Wealth and Treatment: Mixed-Effects Model](#)

##### **b. Statistical Details: Public Solution Contributions**

- i. [Table S10. Public Solution Contributions by Wealth: Mixed-Effects Model](#)
- ii. [Table S11. Public Solution Contributions by Wealth / Treatment: Mixed-Effects Model](#)
- iii. [Table S12. Public Solution Non-Provision and Beliefs in Individual Responsibility](#)
- iv. [Table S13. Individualistic Beliefs and Round 1 Private Solution Contributions](#)
- v. [Table S14. Public Solution Non-Provision and Round 1 Private Solution Contributions](#)

##### **c. Statistical Details: Universal Pathways**

- i. [Table S15. Public Solution Provision and Round 1 Public Solution Contributions](#)
- ii. [Table S16. Conditional Cooperation and Public Solution Provision vs. Non-Provision](#)

## **Supplementary Methods**

**Table S1. Cultural and Economic Factors**

The table summarises the cultural and economic factors that we tested as possible explanations for differences in private solution adoption and public solution provision rates across countries.

| <b>Cultural Factors</b>                  | <b>How defined or measured?</b>                                                                                                                                                                                                                                                                                                            |
|------------------------------------------|--------------------------------------------------------------------------------------------------------------------------------------------------------------------------------------------------------------------------------------------------------------------------------------------------------------------------------------------|
| Individualism Index                      | The degree to which people feel independent as opposed to being interdependent as members of larger wholes. Measured as national score <sup>1</sup> .                                                                                                                                                                                      |
| Power Distance Index                     | The extent to which the less powerful members of organisations / institutions accept and expect that power is distributed unequally <sup>1</sup> .                                                                                                                                                                                         |
| Uncertainty Avoidance                    | A society's tolerance for ambiguity and uncertainty <sup>1</sup> .                                                                                                                                                                                                                                                                         |
| Masculinity vs. Femininity               | The extent to which the use of force is endorsed socially <sup>1</sup> .                                                                                                                                                                                                                                                                   |
| Long-Term vs. Short-Term Orientation     | Deals with change: long-term values include perseverance and thrift; short-term values include reciprocating social obligations and respect for tradition <sup>1</sup> .                                                                                                                                                                   |
| Indulgence                               | Deals with the 'good things in life': in indulgent cultures, it is good to be free; in a restrained culture, life is hard, and duty is the normal state of being <sup>1</sup> .                                                                                                                                                            |
| Survival vs. Self-Expression             | Refers to tolerance, trust, emphasis on subjective well-being, civic activism, and self-expression that emerges in postindustrial societies with high levels of existential security and individual autonomy. Measured as mean score of Post-Materialist 12-item index in World Values Survey Wave 7 (2017-2022) <sup>2</sup> .            |
| Traditional vs. Secular-Rational         | Reflects the contrast between societies in which religion is very important and those in which it is not. Measured as mean Welzel Secular Values score in World Values Survey Wave 7 (2017-2022) <sup>2</sup> .                                                                                                                            |
| Tightness vs. Looseness                  | Refers to strength of social norms and degree of sanctioning within societies <sup>3</sup> .                                                                                                                                                                                                                                               |
| Trust                                    | Measured via the following World Values Survey question: Generally speaking, would you say that most people can be trusted or that you need to be very careful in dealing with people? Defined as the percentage of people within a country responding 'Most people can be trusted' <sup>4</sup> (as reported by the World Values Survey). |
| Trust in Government                      | OECD measure of the share of people who report having confidence in the national government, defined as the % of respondents answering "yes" to the survey question: "In this country, do you have confidence in... national government?" <sup>5</sup>                                                                                     |
| Acceptance of Inequality                 | Measured via the following World Values Survey question: How would you place your views on this scale? 1 = Incomes should be made more equal; 10 = There should be greater incentives for individual effort. Defined as the mean response within each country (as reported by the World Values Survey) <sup>4</sup> .                      |
| Individual vs. Government Responsibility | Measured directly from study participants using the following World Values Survey question: How would you place your views on this scale? 1 = The government should take more responsibility to ensure that everyone is provided for; 10 = People should take more responsibility to provide for themselves.                               |

|                                          |                                                                                                                                                                                                                                                                                                                                                                                                                                                                                         |
|------------------------------------------|-----------------------------------------------------------------------------------------------------------------------------------------------------------------------------------------------------------------------------------------------------------------------------------------------------------------------------------------------------------------------------------------------------------------------------------------------------------------------------------------|
| Success: Luck vs. Merit                  | Measured directly from study participants using the following World Values Survey question: How would you place your views on this scale? 1 = In the long run, hard work usually brings a better life; 10 = Hard work doesn't generally bring success – it's more a matter of luck and connections.                                                                                                                                                                                     |
| Gini Index                               | Most recently available World Bank measure of Gini Coefficient <sup>6</sup> .                                                                                                                                                                                                                                                                                                                                                                                                           |
| GDP per capita                           | Most recently available World Bank measure of GDP per capita (USD) <sup>7</sup> .                                                                                                                                                                                                                                                                                                                                                                                                       |
| Control of Corruption                    | World Bank estimate of perceptions of the extent to which public power is exercised for private gain, ranging from -2.5 to 2.5 <sup>8</sup> .                                                                                                                                                                                                                                                                                                                                           |
| MacArthur Subjective Socioeconomic Scale | Measured directly from participants using an image of a ladder with 10 rungs (numbered 1-10) and the following description: At the top of the ladder are the people who are the best off, those who have the most money, most education, and best jobs. At the bottom are the people who are the worst off, those who have the least money, least education, worst jobs, or no job. Please choose the number that best represents where you think you stand on the ladder. <sup>9</sup> |

**Table S2. Participant Payments**

The table summarises the country, the university where we recruited students, whether this university was a private or public institution, whether the experiment was implemented online or in the lab, the mean payment for participants in the local currency, plus a conversion based on current exchange rates into GBP and purchasing power equivalent based on World Bank data. We aimed for approximately equivalent PPP across countries.

| Country       | University                                                                                         | Institution | Implementation | Mean Payment<br>(Local<br>Currency) | GBP<br>Equivalent | PPP<br>Equivalent |
|---------------|----------------------------------------------------------------------------------------------------|-------------|----------------|-------------------------------------|-------------------|-------------------|
| Australia     | University of Queensland and RMIT (Melbourne)                                                      | Public      | Online         | 12.64                               | 6.64              | 6.07              |
| Austria       | University of Innsbruck                                                                            | Public      | Online         | 6.85                                | 5.99              | 6.44              |
| Canada        | Toronto Metropolitan University                                                                    | Public      | Lab            | 9.33                                | 5.38              | 5.32              |
| China         | Institute of Psychology, Chinese Academy of Sciences; Nanjing Audit University                     | Public      | Lab            | 34.35                               | 3.76              | 6.18              |
| Colombia      | Universidad de los Andes                                                                           | Private     | Online         | 23340.63                            | 5.64              | 11.67             |
| Czech Rep     | Masaryk University Experimental Economics Laboratory (MUEEL)                                       | Public      | Lab            | 167.91                              | 5.18              | 8.40              |
| Denmark       | Aarhus University                                                                                  | Public      | Online         | 58.42                               | 5.36              | 6.43              |
| Dominican Rep | Instituto Tecnológico de Santo Domingo                                                             | Private     | Lab            | 164.16                              | 5.37              | 4.92              |
| Egypt         | British University in Egypt                                                                        | Private     | Online         | 69.28                               | 2.72              | 9.70              |
| France        | GATE, University of Lyon                                                                           | Public      | Lab            | 8.11                                | 7.12              | 8.03              |
| Germany       | University of Hamburg                                                                              | Public      | Online         | 6.95                                | 6.07              | 6.60              |
| Ghana         | University of Ghana                                                                                | Public      | Lab            | 29.84                               | 5.97              | 5.97              |
| Greece        | Hellenic Mediterranean University & University of Crete                                            | Public      | Lab            | 5.60                                | 5.88              | 7.22              |
| Honduras      | Centro Universitario Regional de Occidente (CUROC) de la Universidad Nacional Autónoma de Honduras | Public      | Lab            | 117.40                              | 3.93              | 7.04              |

|              |                                                              |         |        |          |      |               |
|--------------|--------------------------------------------------------------|---------|--------|----------|------|---------------|
| Hong Kong    | Hong Kong University of Science and Technology               | Public  | Online | 53.01    | 5.40 | 6.36          |
| Hungary      | Corvinus University of Budapest; Eötvös Loránd University    | Public  | Lab    | 1376.34  | 5.45 | 5.51          |
| India        | Ashoka University                                            | Private | Lab    | 268.73   | 2.67 | 8.06          |
| Indonesia    | Universitas Gadjah Mada                                      | Public  | Online | 34658.16 | 1.98 | 3.47          |
| Italy        | University of Bologna                                        | Public  | Online | 5.30     | 4.83 | 5.83          |
| Japan        | Institute of Social and Economics Research, Osaka University | Public  | Online | 808.06   | 5.46 | 8.08          |
| Korea        | Seoul National University                                    | Public  | Online | 7752.22  | 4.68 | 6.20          |
| Netherlands  | Vrije Universiteit Amsterdam                                 | Public  | Online | 6.03     | 5.17 | 5.42          |
| Pakistan     | University of the Punjab                                     | Public  | Online | 640.78   | 3.55 | 7.69          |
| Philippines  | Ateneo de Manila University                                  | Private | Lab    | 137.38   | 4.82 | 4.12          |
| Poland       | University of Warsaw                                         | Public  | Online | 19.17    | 3.91 | 6.90          |
| Senegal      | Alioune Diop University of Bambey                            | Public  | Lab    | 1851.94  | 5.34 | 5.56          |
| South Africa | University of Cape Town                                      | Public  | Online | 114.92   | 4.91 | 10.34         |
| Spain        | Universidad de Granada                                       | Public  | Lab    | 6.28     | 5.70 | 7.34          |
| Switzerland  | University of Bern                                           | Public  | Online | 14.66    | 8.48 | 10.11         |
| Taiwan       | National Taiwan University                                   | Public  | Lab    | 186.90   | 4.92 | Not available |
| UAE          | New York University Abu Dhabi                                | Private | Lab    | 116.99   | 5.23 | 33.93         |
| UK           | University of Warwick                                        | Public  | Online | 6.61     | 6.61 | 6.61          |
| Uruguay      | Universidad de la República                                  | Public  | Online | 284.78   | 6.31 | 8.54          |
| US           | University of Maryland                                       | Public  | Online | 8.16     | 6.45 | 5.47          |

**Table S3. Sample Sizes by Country**

Number of complete groups across countries. In countries in which recruitment proved more challenging (Ghana, Pakistan, Uruguay) we prioritised merit and luck groups.

| <b>Country</b> | <b>Merit Groups</b> | <b>Luck Groups</b> | <b>Uncertain Groups</b> | <b>Total</b> |
|----------------|---------------------|--------------------|-------------------------|--------------|
| Australia      | 15                  | 16                 | 14                      | 45           |
| Austria        | 22                  | 20                 | 18                      | 60           |
| Canada         | 17                  | 23                 | 19                      | 59           |
| China          | 39                  | 41                 | 41                      | 121          |
| Colombia       | 17                  | 23                 | 24                      | 64           |
| Czech Rep      | 17                  | 17                 | 17                      | 51           |
| Denmark        | 16                  | 16                 | 15                      | 47           |
| Dominican Rep  | 18                  | 19                 | 28                      | 65           |
| Egypt          | 16                  | 16                 | 14                      | 46           |
| France         | 24                  | 21                 | 21                      | 66           |
| Germany        | 20                  | 20                 | 20                      | 60           |
| Ghana          | 10                  | 18                 | 0                       | 28           |
| Greece         | 13                  | 17                 | 15                      | 45           |
| Honduras       | 18                  | 14                 | 21                      | 53           |
| Hong Kong      | 23                  | 18                 | 19                      | 60           |
| Hungary        | 14                  | 20                 | 22                      | 56           |
| India          | 21                  | 21                 | 22                      | 64           |
| Indonesia      | 20                  | 15                 | 14                      | 49           |
| Italy          | 21                  | 21                 | 22                      | 64           |
| Japan          | 16                  | 15                 | 18                      | 49           |
| Korea          | 16                  | 15                 | 14                      | 45           |
| Netherlands    | 16                  | 18                 | 13                      | 47           |
| Pakistan       | 9                   | 14                 | 1                       | 24           |
| Philippines    | 19                  | 21                 | 16                      | 56           |
| Poland         | 21                  | 22                 | 17                      | 60           |
| Senegal        | 19                  | 20                 | 15                      | 54           |
| South Africa   | 19                  | 18                 | 23                      | 60           |
| Spain          | 13                  | 17                 | 14                      | 44           |
| Switzerland    | 22                  | 20                 | 18                      | 60           |
| Taiwan         | 20                  | 20                 | 20                      | 60           |
| UAE            | 15                  | 19                 | 23                      | 57           |
| UK             | 20                  | 20                 | 22                      | 62           |
| Uruguay        | 15                  | 15                 | 9                       | 39           |
| US             | 19                  | 19                 | 18                      | 56           |
| <b>Average</b> | <b>18</b>           | <b>19</b>          | <b>18</b>               | <b>55</b>    |

**Table S4. Participant Demographics by Country**

The table summarises the proportion of females, 18-24 year olds, and Economics students in our student samples in each country, as well as the average subjective socioeconomic status response (some values are missing because this data was not collected in every country). At the bottom of the table are the outputs of balance checks (chi-squared tests for gender, age, and subject; ANOVA for subjective socioeconomic status) all of which showed that the demographic makeup was different across samples. Table S5 shows that these demographic variables were not associated with significantly different private or public solution adoption rates, however.

| Country       | % Female | % 18-24 | % Economics | Subjective Socioeconomic Status |
|---------------|----------|---------|-------------|---------------------------------|
| Australia     | 53.33    | 65.90   | 15.00       | 6.33                            |
| Austria       | 66.67    | 64.58   | 29.58       | -                               |
| Canada        | 41.95    | 93.64   | -           | -                               |
| China         | 51.45    | 91.74   | 5.17        | 5.42                            |
| Colombia      | 50.78    | 85.04   | 6.64        | 6.31                            |
| Czech Rep     | 51.47    | 85.29   | 54.41       | 5.88                            |
| Denmark       | 55.85    | 66.13   | 10.11       | 6.03                            |
| Dominican Rep | 46.54    | 98.46   | -           | -                               |
| Egypt         | 39.13    | 97.28   | -           | -                               |
| France        | 57.20    | 94.68   | 21.21       | -                               |
| Germany       | 66.67    | 39.48   | -           | -                               |
| Ghana         | 34.82    | 91.07   | 6.25        | 6.49                            |
| Greece        | 63.33    | 96.00   | -           | 5.18                            |
| Honduras      | 60.38    | 86.67   | 24.06       | 5.09                            |
| Hong Kong     | 55.83    | 100.00  | 10.42       | 5.51                            |
| Hungary       | 45.09    | 94.62   | 66.52       | 6.68                            |
| India         | 50.78    | 100.00  | -           | 6.39                            |
| Indonesia     | 62.76    | 94.39   | 39.29       | 6.04                            |
| Italy         | 62.89    | 58.98   | 2.34        | 6.15                            |
| Japan         | 40.31    | 83.16   | -           | -                               |
| Korea         | 17.78    | 53.93   | -           | -                               |
| Netherlands   | 21.28    | 96.28   | 34.57       | 7.13                            |
| Pakistan      | 61.46    | 76.04   | 19.79       | 6.55                            |

|                          |              |              |        |        |
|--------------------------|--------------|--------------|--------|--------|
| Philippines              | 48.21        | 98.21        | 3.12   | 6.66   |
| Poland                   | 56.67        | 93.75        | -      | 5.82   |
| Senegal                  | 55.56        | 84.72        | 50.46  | 6.11   |
| South Africa             | 58.75        | 82.01        | 3.75   | 5.25   |
| Spain                    | 46.59        | 90.17        | 89.20  | 5.81   |
| Switzerland              | 53.75        | 59.58        | 27.08  | 6.19   |
| Taiwan                   | 40.42        | 85.77        | 10.00  | 4.52   |
| UAE                      | 49.56        | 97.81        | 23.68  | 6.10   |
| UK                       | 34.68        | 66.94        | 18.95  | 5.82   |
| Uruguay                  | 56.41        | 68.42        | -      | 5.80   |
| US                       | 62.50        | 94.64        | -      | -      |
| <b>All</b>               | <b>51.49</b> | <b>83.91</b> |        |        |
| <b>Balance check</b>     |              |              |        |        |
| <b>between countries</b> | < .001       | < .001       | < .001 | < .001 |
| <b>(<i>p</i> value)</b>  |              |              |        |        |



**Table S5. Demographic Variables and Private and Public Solution Adoption**

The table shows the results of generalised linear regression models of private and public solution adoption rates as binomial outcome variables. The models included the main predictors (wealth and country) plus the main demographics (gender, age, subject, and subjective socioeconomic status [SES]) as independent variables. We include coefficient estimates only for demographic variables, which represent a comparison with a female, 18-24 year old participant who studies Economics. We collapsed 55-64 and 65+ year olds into '55+' because of the small sample sizes. Results indicate that our demographic variables did not significantly influence private or public solution adoption rates.

| <b>Private Solution Adoption</b> |                 |                       |                |                |
|----------------------------------|-----------------|-----------------------|----------------|----------------|
| <b>Term</b>                      | <b>Estimate</b> | <b>Standard Error</b> | <b>z value</b> | <b>p value</b> |
| (Intercept)                      | 0.37            | 0.22                  | 1.67           | .095           |
| Gender: Male                     | -0.08           | 0.07                  | -1.21          | .228           |
| Gender: Other                    | 0.36            | 0.23                  | 1.55           | .120           |
| Age: 25-34                       | -0.16           | 0.10                  | -1.67          | .095           |
| Age: 35-44                       | 0.09            | 0.30                  | 0.29           | .770           |
| Age: 45-54                       | 0.10            | 0.47                  | 0.22           | .828           |
| Age: 55+                         | 1.21            | 0.77                  | 1.57           | .118           |
| Subject: Humanities              | -0.16           | 0.15                  | -1.11          | .267           |
| Subject: Other                   | -0.03           | 0.10                  | -0.35          | .727           |
| Subject:<br>Psychology           | -0.07           | 0.20                  | -0.33          | .743           |
| SES                              | 0.01            | 0.02                  | 0.42           | .677           |
| <b>Public Solution Adoption</b>  |                 |                       |                |                |
| <b>Term</b>                      | <b>Estimate</b> | <b>Standard Error</b> | <b>z value</b> | <b>p value</b> |
| (Intercept)                      | 0.98            | 0.23                  | 4.23           | < .001         |
| Gender: Male                     | 0.07            | 0.07                  | 1.00           | .315           |
| Gender: Other                    | -0.10           | 0.23                  | -0.45          | .654           |
| Age: 25-34                       | 0.15            | 0.11                  | 1.42           | .156           |
| Age: 35-44                       | 0.48            | 0.36                  | 1.33           | .185           |
| Age: 45-54                       | 0.14            | 0.50                  | 0.28           | .779           |
| Age: 55+                         | 0.86            | 1.08                  | 0.79           | .429           |
| Subject: Humanities              | -0.01           | 0.16                  | -0.05          | .964           |
| Subject: Other                   | -0.15           | 0.10                  | -1.53          | .127           |
| Subject:<br>Psychology           | -0.20           | 0.22                  | -0.92          | .357           |
| SES                              | 0.01            | 0.02                  | 0.42           | .678           |

## Instructions for Experimenters

The below text was sent to all experimenters leading sessions in advance of implementation.

### Before the sessions

- To test the code, please see instructions in the README file.
- Where possible, this experiment should be conducted online. This is to ensure consistency with previous implementations. Where this is not possible, subjects should be invited to a lab that ensures the privacy and anonymity of their decisions.
- Please recommend to subjects that they participate using a laptop or computer to minimise any compatibility issues and maximise clarity, although it is also possible for them to use a smartphone.
- We recommend inviting no more than 60 subjects to a session. At the start of the session, subjects will be randomly assigned to groups of four. Any subject who is not assigned to a group should be paid their participation fee and is free to leave.
- We are aiming to collect data from 240 participants in total, which is 20 groups in each treatment. Because groups are randomly assigned to treatments at the start of each session, the number of groups in each treatment may not be perfectly balanced. We may therefore need to run a follow-up session in which only treatments that have less than 20 groups are allowed (we can adjust this in lines 52-54 of the settings.py file).
- The easiest way to set up a session on oTree is to create a room, set 'Session config' as 'Full Experiment', and add the number of subjects that you have invited. The number of participants present will update when subjects join. You can then click Create to start the session, and monitor participants using the Monitor tab.

### During the sessions

- To run a session, please use the Rooms (rather than Sessions) function on oTree.
- At the start of the session, please ensure that you mention the following points:
  - 1) Please use an active browser window and not have other browser tabs open while participating.
  - 2) You are participating in groups, so there may be times when you have to wait for other members of their group. If you are waiting a long time (more than a few minutes) please try refreshing the page.
  - 3) Instructions in the experiment will only be provided once, so please ensure that you read these very carefully before proceeding. If you have any questions at any stage, you should message me (or raise your hand if in the lab).
- When monitoring the experiment, if you see that a participant stays on one page for more than 3-4 minutes, it may be appropriate to contact them to check that they are not experiencing any difficulties. In the rare event that they remain on one page for more than 10 minutes, they will 'time out' and be advanced to the end of the experiment, along with the other three members of their group.

- For the effort task, we are really interested in effort rather than mental arithmetic ability – so subjects can use a calculator if they wish (but we should not explicitly instruct them to do so).

#### **After the sessions**

- Please thank subjects for participating and confirm how and when they can expect to be paid according to your local procedure.
- Subjects' payoffs are calculated automatically and stored in the variable 'participant.total\_payout\_local\_currency'.
- Please ensure that all data is anonymised and then send a CSV file to me ([eugene.malthouse@warwick.ac.uk](mailto:eugene.malthouse@warwick.ac.uk)). I can then run this through my R script and we can discuss results together.

## Instructions for Participants

The experiment code is available to download at: <https://osf.io/zg8nj/>. It can also be tested using the following link: <https://privatepublic.herokuapp.com/>. Below we provide screenshots from the English version of the experiment, conducted with students at the University of Warwick.

### Overview

After reading an information sheet and completing a consent form, participants were asked for their age in years and gender. They were then presented with the following overview, depending on the treatment.

Merit Treatment:

### Overview

You have now been randomly assigned to a group of 4 players (including you). Everyone in the group will complete this study at the same time, which means that you may have to wait for others at certain stages. We ask you to be patient in these moments.

This study consists of two sections: **1) a mental arithmetic task**, completed by each participant individually; and **2) a problem-solving game** played in your group, in which you can earn additional money.

**1) The mental arithmetic task** will last 5 minutes. Each question consists of adding up five randomly generated two-digit numbers (e.g.  $14 + 10 + 21 + 45 + 78 = ?$ ). You will score one point for each correct answer.

**2) The problem-solving game** will be played in your group of four. At the start of the game, you will be given some **Monetary units (MU)**.

There is a possibility that you will lose these MU during the game, but we will explain how you can prevent this from happening. If you successfully prevent this, at the end of the study your MU will be converted into cash (1 MU = £0.10) and sent to you as a bonus payment.

#### IMPORTANT!

**In each group, two players will start the game with 120MU and two players will start the game 80MU. The two players who score highest in the mental arithmetic task will start with 120MU, while the two players who score lowest will start with 80MU.**

Further instructions about the game will be provided after you have completed the mental arithmetic task on the following page.

Please note: your time will start as soon as you click Next below – you will have five minutes to complete as many questions as you can. Good luck!

Next

## Luck Treatment:

### Overview

You have now been randomly assigned to a group of 4 players (including you). Everyone in the group will complete this study at the same time, which means that you may have to wait for others at certain stages. We ask you to be patient in these moments.

This study consists of two sections: **1) a mental arithmetic task**, completed by each participant individually, in which you can earn additional money; and **2) a problem-solving game** played in your group, in which you can also earn additional money.

**1) The mental arithmetic task** will last 5 minutes. Each question consists of adding up five randomly generated two-digit numbers (e.g.  $14 + 10 + 21 + 45 + 78 = ?$ ). You will score one point for each correct answer. Your total score will be recorded, and the highest-scoring player in each group will receive a **£1 bonus after the study has concluded**.

**2) The problem-solving game** will be played in your group of four. At the start of the game, you will be given some **Monetary units (MU)**.

There is a possibility that you will lose these MU during the game, but we will explain how you can prevent this from happening. If you successfully prevent this, at the end of the study your MU will be converted into cash (1 MU = £0.10) and sent to you as a bonus payment.

#### IMPORTANT!

**In each group, two players will start the game with 120MU and two players will start the game 80MU. Which two players start with 120MU and which two start with 80MU will be determined randomly by a lottery.**

Further instructions about the game will be provided after you have completed the mental arithmetic task on the following page.

Please note: your time will start as soon as you click Next below – you will have five minutes to complete as many questions as you can. Good luck!

Next

## Uncertain Treatment:

### Overview

You have now been randomly assigned to a group of 4 players (including you). Everyone in the group will complete this study at the same time, which means that you may have to wait for others at certain stages. We ask you to be patient in these moments.

This study consists of two sections: **1) a mental arithmetic task**, completed by each participant individually; and **2) a problem-solving game** played in your group, in which you can earn additional money.

**1) The mental arithmetic task** will last 5 minutes. Each question consists of adding up five randomly generated two-digit numbers (e.g.  $14 + 10 + 21 + 45 + 78 = ?$ ). You will score one point for each correct answer.

**2) The problem-solving game** will be played in your group of four. At the start of the game, you will be given some **Monetary units (MU)**.

There is a possibility that you will lose these MU during the game, but we will explain how you can prevent this from happening. If you successfully prevent this, at the end of the study your MU will be converted into cash (1MU = £0.10) and sent to you as a bonus payment.

#### IMPORTANT!

**In each group, two players will start the problem-solving game with 120MU and two players will start with 80MU. Whether you start with 120MU or 80MU will be determined either by your performance in the effort task or by a lottery – the computer will choose.**

If the computer chooses task performance for you, you will receive 120MU if you were one of the two highest-scoring players in the group, and you will receive 80MU if you were one of the two lowest-scoring players in the group.

If the computer chooses the lottery for you, there is a 50% chance that you will receive 120MU and a 50% chance that you will receive 80MU.

Further instructions about the game will be provided after you have completed the mental arithmetic task on the following page.

Please note: your time will start as soon as you click Next below – you will have five minutes to complete as many questions as you can. Good luck!

Next

## Effort Task

Participants then completed a five-minute mental arithmetic task in which they scored one point per correct answer.

### Mental Arithmetic Task

Total time left **4:55**

**Your current score is 0**

$47 + 62 + 51 + 73 + 73 = ?$

Number Entered

Next

## Budget Assignment

Participants were then told whether they would start the game with 120 MU or 80 MU and reminded that this was determined either by merit, luck, or one of the two (depending on the treatment).

Merit Treatment:

### Budget Assignment

Congratulations, you (along with one other player in your group) will start the game with **120MU**. The other two players will start with **80MU**.

**Each player's starting budget was determined by their performance in the mental arithmetic task.**

You can choose to use this money as you wish during the game, and all your decisions will be made anonymously.

Click Next below to find out how the game will be played.

Next

### Budget Assignment

Unfortunately, you (along with one other player in your group) will start the game with **80MU**. The other two players will start with **120MU**.

**Each player's starting budget was determined by their performance in the mental arithmetic task.**

You can choose to use this money as you wish during the game, and all your decisions will be made anonymously.

Click Next below to find out how the game will be played.

Next

## Luck Treatment:

### Budget Assignment

Congratulations, you (along with one other player in your group) will start the game with **120MU**. The other two players will start with **80MU**.

**Each player's starting budget was determined randomly by a lottery.**

You can choose to use this money as you wish during the game, and all your decisions will be made anonymously.

Click Next below to find out how the game will be played.

Next

### Budget Assignment

Unfortunately, you (along with one other player in your group) will start the game with **80MU**. The other two players will start with **120MU**.

**Each player's starting budget was determined randomly by a lottery.**

You can choose to use this money as you wish during the game, and all your decisions will be made anonymously.

Click Next below to find out how the game will be played.

Next

## Uncertain Treatment:

### Budget Assignment

Congratulations, you (along with one other player in your group) will start the game with **120MU**. The other two players will start with **80MU**.

**Each player's starting budget was determined either by their performance in the mental arithmetic task or by a lottery.**

You can choose to use this money as you wish during the game, and all your decisions will be made anonymously.

Click Next below to find out how the game will be played.

Next

### Budget Assignment

Unfortunately, you (along with one other player in your group) will start the game with **80MU**. The other two players will start with **120MU**.

**Each player's starting budget was determined either by their performance in the mental arithmetic task or by a lottery.**

You can choose to use this money as you wish during the game, and all your decisions will be made anonymously.

Click Next below to find out how the game will be played.

Next

## Game Instructions

Participants were then presented with more detailed about how the game worked. These instructions were the same in all three treatments.

### How the Game Works

**Instructions** The game will be played as a group over 10 rounds. As outlined in the previous pages, there is a possibility that you will lose your MU **after 10 rounds**. To prevent this from happening, you have two options:

#### 1) Solve the problem privately

You can solve the problem privately by investing **60MU** into your private account.

If you invest 60MU into your private account, at the end of the game you will get to keep all your remaining MU that you did not invest.

Each group member has their own private account that they can invest in.

#### 2) Solve the problem as a group

You can solve the problem as a group by collectively investing **160MU** in the group account (on average **40MU** per person).

If together you invest 160MU into the group account, at the end of the game every player in the group will get to keep all remaining MU that they did not invest.

#### Important points for the game:

- **All MU that you invest in the private and group accounts is spent and will not count towards your payment at the end of the game.**

- To avoid losing your remaining MU, **you only need to solve the problem privately or as a group** (not both - although if you do solve it both privately and as a group you will also get to keep your remaining MU at the end of the game).

- In each round, you can invest up to a total of **20MU** in the private and group accounts. In other words, **you can only spend up to 20MU of your budget in each round**. Your decision will be anonymous. At the same time, the other group members will also decide how to invest their MU.

- At the end of each round, you will see the total amount in your private account and the total amount in the group account. And your remaining MU.

- As a reminder: **if you do not solve the problem privately or as a group, you will lose all your remaining MU**. But if you solve the problem privately and/or as a group, your remaining MU will be converted into cash and sent to you as a bonus payment (1 MU = £0.10).

- On the next page, you will be asked four multiple choice questions to check your understanding of the game.

Next



## Pre-Game Quiz

After reading these instructions, participants completed a quiz to check their comprehension. They had to answer the four multiple-choice questions correctly in order to proceed to the game.

After this page, we confirmed the correct answers and they proceeded to make their decision in the first round of the game.

### Pre-Game Quiz

Please answer the following questions. The correct answers to the first four questions about the game instructions will be revealed on the following page.

1) How much in MU would each player have to invest in their private account to solve the problem privately?

☐ 0   ☐ 20   ☐ 40   ☐ 60

2) On average, how much in total (in MU) would each player in the group have to invest in the group account to solve the problem as a group, which costs 160MU?

☐ 0   ☐ 20   ☐ 40   ☐ 60

3) If you solve the problem as a group by collectively investing 160MU into the group account, and you have 20MU remaining, how much in MU do you get to keep at the end of the game?

☐ 0   ☐ 20   ☐ 40   ☐ 60

4) If you fail to solve the problem as a group, and you fail to invest enough in your private account to solve the problem privately, how much in MU do you get to keep at the end of the game?

☐ 0   ☐ 20   ☐ 40   ☐ 60

5) What do you think would be a fair total contribution to the group account from richer players (who start the game with 120MU)?

6) What do you think would be a fair total contribution to the group account from poorer players (who start the game with 80MU)?

Next

## Contribution Page

### Contribution

This is round 1 of 10.

You have **120MU** remaining. You can invest up to **20MU** in this round.

So far you have invested **0MU** in your private account.

You need to invest a further **60MU** to solve the problem privately.

How much in MU would you like to invest in your private account in this round?

You have invested **0MU** in the group account.

In total, the group has invested **0MU** in the group account.

Collectively, you need to invest a further **160MU** to solve the problem as a group.

How much in MU would you like to invest in the group account in this round?

Next

## Supplementary Tables

### Statistical Details: Private Solution Adoption

**Table S6. Private Solution Adoption by Wealth**

The table summarises the number and proportion of rich and poor players who achieved the private solution within 10 rounds.

| Wealth | Private Solution Adopted | Not Adopted | % Adopted | $\chi^2$ | <i>p</i> |
|--------|--------------------------|-------------|-----------|----------|----------|
| Rich   | 2330                     | 1422        | 62.1      | 681.8    | < .001   |
| Poor   | 1200                     | 2552        | 32.0      |          |          |

**Table S7. Private Solution Adoption: Mixed-Effects Model**

The table shows the output of our best-performing (based on AIC / BIC criteria) generalised logistic mixed-effects model used to investigate the relationship between wealth and private solution adoption while accounting for random group-level and country-level effects. The model allowed for variability in the baseline likelihood of private solution adoption across different groups and countries. It also allowed the effect of wealth on private solution adoption to vary between countries. It used a logit link function to model the log-odds of private solution adoption. Fixed effect and odds ratio (OR) estimates indicate that the odds of achieving the private solution when wealth is rich are 85% higher than when wealth is poor; and when wealth is poor the odds of achieving the private solution are around 20% of those when wealth is rich. The random effect estimates show a weak negative relationship between the random intercepts and slopes for wealth (-0.19), indicating that the wealth effect in countries with higher private solution adoption tended to have slightly lower variability.

| Fixed Effects  |                            |                |                |                |
|----------------|----------------------------|----------------|----------------|----------------|
| Term           | Estimate (OR)              | Standard Error | <i>z</i> value | <i>p</i> value |
| (Intercept)    | 0.62 (1.85)                | 0.10           | 6.13           | < .001         |
| Wealth Poor    | -1.61 (0.20)               | 0.10           | -16.91         | < .001         |
| Random Effects |                            |                |                |                |
| Group          | Term                       | Variance       | SD             | Correlation    |
| Group          | Intercept                  | 0.90           | 0.95           |                |
| Country        | Intercept                  | 0.27           | 0.52           |                |
| Country        | Intercept +<br>Wealth Poor | 0.19           | 0.43           | -0.19          |

**Table S8. Private Solution Adoption by Country, Wealth, and Treatment**

The table summarises the number and proportion of rich and poor players who achieved the private solution within 10 rounds in each country and treatment. It also shows the results of chi-squared tests comparing private solution adoption rates between treatments among both rich and poor players – none of which revealed a statistically significant difference. These results indicate that the source of wealth did not influence preferences for private solutions in any country.

| Country       | Wealth | Private Solution Adopted (%) |                     |                 | $\chi^2$ | <i>p</i> |
|---------------|--------|------------------------------|---------------------|-----------------|----------|----------|
|               |        | Luck Treatment               | Uncertain Treatment | Merit Treatment |          |          |
| Australia     | Rich   | 65.6                         | 57.1                | 60.0            | 0.48     | .788     |
|               | Poor   | 28.1                         | 17.9                | 23.3            | 0.88     | .644     |
| Austria       | Rich   | 52.5                         | 61.1                | 47.7            | 1.44     | .486     |
|               | Poor   | 30.0                         | 38.9                | 15.9            | 5.43     | .066     |
| Canada        | Rich   | 73.9                         | 71.1                | 76.5            | 0.27     | .872     |
|               | Poor   | 28.3                         | 23.7                | 38.2            | 1.89     | .388     |
| China         | Rich   | 81.7                         | 68.3                | 70.5            | 4.34     | .114     |
|               | Poor   | 56.1                         | 42.7                | 59.0            | 4.91     | .086     |
| Colombia      | Rich   | 58.7                         | 56.3                | 61.8            | 0.25     | .883     |
|               | Poor   | 19.6                         | 22.9                | 11.8            | 1.66     | .437     |
| Czech Rep     | Rich   | 41.2                         | 47.1                | 44.1            | 0.24     | .888     |
|               | Poor   | 11.8                         | 20.6                | 17.6            | 0.99     | .61      |
| Denmark       | Rich   | 50.0                         | 50.0                | 59.4            | 0.75     | .689     |
|               | Poor   | 28.1                         | 16.7                | 15.6            | 1.89     | .388     |
| Dominican Rep | Rich   | 78.9                         | 80.4                | 75.0            | 0.38     | .827     |
|               | Poor   | 44.7                         | 48.2                | 27.8            | 3.99     | .136     |
| Egypt         | Rich   | 56.3                         | 57.1                | 56.3            | 0.01     | .997     |
|               | Poor   | 28.1                         | 39.3                | 28.1            | 1.12     | .57      |
| France        | Rich   | 45.2                         | 40.5                | 50.0            | 0.82     | .663     |
|               | Poor   | 26.2                         | 9.5                 | 27.1            | 5.05     | .08      |
| Germany       | Rich   | 42.5                         | 57.5                | 52.5            | 1.87     | .393     |
|               | Poor   | 10.0                         | 30.0                | 30.0            | 5.96     | .051     |
| Greece        | Rich   | 61.8                         | 46.7                | 50.0            | 1.62     | .444     |
|               | Poor   | 26.5                         | 13.3                | 26.9            | 2.06     | .357     |
| Honduras      | Rich   | 75.0                         | 54.8                | 63.9            | 2.97     | .227     |
|               | Poor   | 10.7                         | 16.7                | 5.6             | 2.40     | .302     |
| Hong Kong     | Rich   | 72.2                         | 76.3                | 58.7            | 3.35     | .188     |
|               | Poor   | 41.7                         | 55.3                | 47.8            | 1.38     | .503     |
| Hungary       | Rich   | 45.0                         | 52.3                | 42.9            | 0.74     | .69      |
|               | Poor   | 22.5                         | 20.5                | 14.3            | 0.73     | .693     |
| India         | Rich   | 64.3                         | 70.5                | 52.4            | 3.08     | .214     |
|               | Poor   | 45.2                         | 56.8                | 35.7            | 3.87     | .144     |
| Indonesia     | Rich   | 83.3                         | 78.6                | 80.0            | 0.23     | .893     |
|               | Poor   | 43.3                         | 42.9                | 35.0            | 0.65     | .722     |
| Italy         | Rich   | 52.4                         | 52.3                | 57.1            | 0.26     | .876     |
|               | Poor   | 21.4                         | 27.3                | 28.6            | 0.64     | .727     |
| Japan         | Rich   | 50.0                         | 55.6                | 62.5            | 0.99     | .61      |
|               | Poor   | 36.7                         | 52.8                | 40.6            | 1.93     | .381     |
| Korea         | Rich   | 50.0                         | 67.9                | 75.0            | 4.43     | .109     |
|               | Poor   | 40.0                         | 57.1                | 56.3            | 2.23     | .328     |
| Netherlands   | Rich   | 55.6                         | 76.9                | 75.0            | 4.24     | .12      |
|               | Poor   | 38.9                         | 34.6                | 43.8            | 0.51     | .776     |
| Pakistan      | Rich   | 71.4                         | 50.0                | 83.3            | 1.52     | .467     |
|               | Poor   | 21.4                         | 0.0                 | 11.1            | 1.26     | .533     |

| Country      | Wealth | Private Solution Adopted (%) |                     |                 | $\chi^2$ | <i>p</i> |
|--------------|--------|------------------------------|---------------------|-----------------|----------|----------|
|              |        | Luck Treatment               | Uncertain Treatment | Merit Treatment |          |          |
| Philippines  | Rich   | 66.7                         | 65.6                | 71.1            | 0.28     | .87      |
|              | Poor   | 40.5                         | 46.9                | 34.2            | 1.16     | .559     |
| Poland       | Rich   | 68.2                         | 55.9                | 76.2            | 3.55     | .17      |
|              | Poor   | 43.2                         | 26.5                | 35.7            | 2.33     | .312     |
| Senegal      | Rich   | 75.0                         | 80.0                | 63.2            | 2.61     | .271     |
|              | Poor   | 10.0                         | 23.3                | 21.1            | 2.59     | .274     |
| South Africa | Rich   | 72.2                         | 73.9                | 71.1            | 0.09     | .957     |
|              | Poor   | 38.9                         | 32.6                | 26.3            | 1.33     | .514     |
| Spain        | Rich   | 64.7                         | 71.4                | 65.4            | 0.36     | .835     |
|              | Poor   | 17.6                         | 28.6                | 19.2            | 1.20     | .548     |
| Switzerland  | Rich   | 35.0                         | 41.7                | 45.5            | 0.96     | .618     |
|              | Poor   | 22.5                         | 27.8                | 15.9            | 1.67     | .434     |
| Taiwan       | Rich   | 55.0                         | 47.5                | 40.0            | 1.80     | .406     |
|              | Poor   | 30.0                         | 22.5                | 20.0            | 1.18     | .554     |
| UAE          | Rich   | 34.2                         | 52.2                | 56.7            | 4.11     | .128     |
|              | Poor   | 21.1                         | 21.7                | 26.7            | 0.35     | .839     |
| UK           | Rich   | 90.0                         | 77.3                | 72.5            | 4.08     | .13      |
|              | Poor   | 70.0                         | 65.9                | 52.5            | 2.89     | .236     |
| Uruguay      | Rich   | 56.7                         | 44.4                | 73.3            | 4.18     | .124     |
|              | Poor   | 23.3                         | 27.8                | 36.7            | 1.32     | .518     |
| US           | Rich   | 57.9                         | 69.4                | 73.7            | 2.29     | .318     |
|              | Poor   | 36.8                         | 25.0                | 36.8            | 1.55     | .461     |

**Table S9. Private Solution Adoption by Wealth and Treatment: Mixed-Effects Model**

The table shows the output of a generalised logistic mixed-effects model used to test the effect of wealth and treatment on private solution adoption while allowing for variability in the baseline likelihood of private solution adoption across different groups and countries. It used a logit link function to model the log-odds of private solution adoption. The results indicate that wealth influenced the likelihood of private solution adoption but treatment did not.

| <b>Fixed Effects</b>  |                 |                       |                |                |
|-----------------------|-----------------|-----------------------|----------------|----------------|
| <b>Term</b>           | <b>Estimate</b> | <b>Standard Error</b> | <b>z value</b> | <b>p value</b> |
| (Intercept)           | 0.63            | 0.12                  | 5.28           | < .001         |
| Wealth Poor           | -1.66           | 0.10                  | -16.85         | < .001         |
| Uncertain Treatment   | -0.03           | 0.11                  | -0.28          | .777           |
| Luck Treatment        | -0.03           | 0.11                  | -0.24          | .809           |
| Poor x Uncertain      | 0.17            | 0.14                  | 1.22           | .223           |
| Poor x Luck           | 0.09            | -0.13                 | 0.69           | .492           |
| <b>Random Effects</b> |                 |                       |                |                |
| <b>Group</b>          | <b>Term</b>     | <b>Variance</b>       | <b>SD</b>      |                |
| Group                 | Intercept       | 0.92                  | 0.96           |                |
| Country               | Intercept       | 0.28                  | 0.53           |                |

### Statistical Details: Public Solution Contributions

**Table S10. Public Solution Contributions by Wealth: Mixed-Effects Model**

The table shows the output of our best-performing linear mixed-effects model (based on AIC / BIC criteria) fitted to test the effect of wealth on public solution contributions (as a proportion of wealth in each round). It included random fixed wealth and round effects and random country, group, and individual intercepts; while also allowing the effect of wealth to vary at the country level. Fixed effect results indicate that poor players contributed a higher proportion of their wealth than rich players. Random effect results indicate that proportional contributions varied more at the individual level than at group and country levels.

| Fixed Effects  |                            |                |                |                |
|----------------|----------------------------|----------------|----------------|----------------|
| Term           | Estimate                   | Standard Error | <i>t</i> value | <i>p</i> value |
| (Intercept)    | 8.17                       | 0.22           | 37.70          | < .001         |
| Wealth Poor    | 2.71                       | 0.25           | 29.67          | < .001         |
| Random Effects |                            |                |                |                |
| Group          | Term                       | Variance       | SD             | Correlation    |
| ID             | Intercept                  | 28.66          | 5.35           |                |
| Group          | Intercept                  | 3.84           | 1.96           |                |
| Country        | Intercept                  | 1.10           | 1.05           |                |
| Country        | Intercept +<br>Wealth Poor | 1.54           | 1.24           | .99            |
| Residual       |                            | 54.59          | 7.39           |                |

**Table S11. Public Solution Contributions by Wealth / Treatment: Mixed-Effects Model**

The table shows the output of a linear mixed-effects model of players' contributions as a proportion of their wealth in each round. The model included wealth and treatment plus their interaction as fixed effects, as well as a separate fixed round effect to control for changes in contributions over time. It also included random intercepts at the individual, group, and country level to account for variability at these levels.

| <b>Fixed Effects</b>  |                 |                       |                       |                       |
|-----------------------|-----------------|-----------------------|-----------------------|-----------------------|
| <b>Term</b>           | <b>Estimate</b> | <b>Standard Error</b> | <b><i>t</i> value</b> | <b><i>p</i> value</b> |
| (Intercept)           | 8.13            | 0.34                  | 23.59                 | < .001                |
| Wealth Poor           | 2.70            | 0.24                  | 11.06                 | < .001                |
| Treatment Uncertain   | -0.12           | 0.27                  | -0.44                 | .662                  |
| Treatment Luck        | 0.35            | 0.27                  | 1.30                  | .192                  |
| Round                 | -0.55           | 0.01                  | -47.90                | < .001                |
| Poor x Uncertain      | 0.02            | 0.35                  | 0.07                  | .943                  |
| Poor x Luck           | -0.21           | 0.34                  | 0.61                  | .539                  |
| <b>Random Effects</b> |                 |                       |                       |                       |
| <b>Group</b>          | <b>Term</b>     | <b>Variance</b>       | <b>SD</b>             |                       |
| ID                    | Intercept       | 29.16                 | 5.40                  |                       |
| Group                 | Intercept       | 3.70                  | 1.92                  |                       |
| Country               | Intercept       | 2.71                  | 1.65                  |                       |
| Residual              |                 | 54.59                 | 7.39                  |                       |

**Table S12. Public Solution Non-Provision and Beliefs in Individual Responsibility**

The table shows the output of a generalised logistic mixed-effects model with the average belief in individual responsibility among group members as the predictor variable and public solution provision (1 = provision, 0 = non-provision) as the outcome variable. The model included random intercepts at the country level.

| <b>Fixed Effects</b>                |                 |                       |                |                |
|-------------------------------------|-----------------|-----------------------|----------------|----------------|
| <b>Term</b>                         | <b>Estimate</b> | <b>Standard Error</b> | <b>z value</b> | <b>p value</b> |
| (Intercept)                         | 1.17            | 0.25                  | 4.76           | < .001         |
| Belief in Individual Responsibility | -0.12           | 0.04                  | -3.10          | < .001         |
| <b>Random Effects</b>               |                 |                       |                |                |
| <b>Group</b>                        | <b>Term</b>     | <b>Variance</b>       | <b>SD</b>      |                |
| Country                             | Intercept       | 0.52                  | 0.72           |                |

**Table S13. Individualistic Beliefs and Round 1 Private Solution Contributions**

The table shows the output of a linear mixed-effects model with participants' agreement that people should take greater responsibility for themselves (1-10) as the predictor variable and their first round contribution to the private solution (0-20) as the outcome variable. The model included random intercepts at the country level to account for variability within countries.

| <b>Fixed Effects</b>                |                 |                       |                |                |
|-------------------------------------|-----------------|-----------------------|----------------|----------------|
| <b>Term</b>                         | <b>Estimate</b> | <b>Standard Error</b> | <b>z value</b> | <b>p value</b> |
| (Intercept)                         | 6.83            | 0.38                  | 17.95          | < .001         |
| Belief in Individual Responsibility | 0.08            | 0.03                  | 2.43           | .015           |
| <b>Random Effects</b>               |                 |                       |                |                |
| <b>Group</b>                        | <b>Term</b>     | <b>Variance</b>       | <b>SD</b>      |                |
| Country                             | Intercept       | 3.64                  | 1.91           |                |
| Residual                            |                 | 51.48                 | 7.18           |                |



**Table S14. Public Solution Non-Provision and Round 1 Private Solution Contributions**

The table shows the output of a generalised logistic mixed-effects model with the average first round contribution to the private solution among group members as the predictor variable and public solution provision (1 = provision, 0 = non-provision) as the outcome variable. As above, the model included random intercepts at the country level to account for national variability.

| Fixed Effects                               |           |                |         |         |
|---------------------------------------------|-----------|----------------|---------|---------|
| Term                                        | Estimate  | Standard Error | z value | p value |
| (Intercept)                                 | 0.99      | 0.15           | 6.83    | < .001  |
| Round 1 Contribution to<br>Private Solution | -0.06     | 0.01           | -8.81   | < .001  |
| Random Effects                              |           |                |         |         |
| Group                                       | Term      | Variance       | SD      |         |
| Country                                     | Intercept | 0.52           | 0.72    |         |

## Statistical Details: Universal Pathways for Public Solutions

**Table S15. Public Solution Provision and Round 1 Public Solution Contributions**

The table shows the output of a generalised logistic mixed-effects model with the average first round contribution to the public solution among group members as the predictor variable and public solution provision (1 = provision, 0 = non-provision) as the outcome variable. The model included random intercepts at the country level.

| Fixed Effects                              |           |                |         |         |
|--------------------------------------------|-----------|----------------|---------|---------|
| Term                                       | Estimate  | Standard Error | z value | p value |
| (Intercept)                                | -2.99     | 0.20           | -15.28  | < .001  |
| Round 1 Contribution to<br>Public Solution | 0.11      | 0.01           | 19.45   | < .001  |
| Random Effects                             |           |                |         |         |
| Group                                      | Term      | Variance       | SD      |         |
| Country                                    | Intercept | 0.17           | 0.41    |         |

**Table S16. Conditional Cooperation and Public Solution Provision vs. Non-Provision**

The table shows the output of a linear mixed-effects model with players' contributions as the outcome variable, three fixed effects (average public solution contribution from group members on previous round, round, and public solution provision) and random individual and country effects to account for variability at these levels.

| <b>Fixed Effects</b>                                               |                 |                       |                       |                       |
|--------------------------------------------------------------------|-----------------|-----------------------|-----------------------|-----------------------|
| <b>Term</b>                                                        | <b>Estimate</b> | <b>Standard Error</b> | <b><i>t</i> value</b> | <b><i>p</i> value</b> |
| (Intercept)                                                        | 5.02            | 0.13                  | 39.43                 | < .001                |
| Group Contribution<br>Previous Round                               | -0.01           | 0.01                  | -0.54                 | .591                  |
| Public Solution Provided                                           | 1.45            | 0.09                  | 16.41                 | < .001                |
| Round                                                              | -0.47           | 0.01                  | -46.35                | < .001                |
| Group Contribution<br>Previous Round x Public<br>Solution Provided | 0.23            | 0.01                  | 18.10                 | < .001                |
| <b>Random Effects</b>                                              |                 |                       |                       |                       |
| <b>Group</b>                                                       | <b>Term</b>     | <b>Variance</b>       | <b>SD</b>             |                       |
| ID                                                                 | Intercept       | 4.96                  | 2.23                  |                       |
| Country                                                            | Intercept       | 0.25                  | 0.50                  |                       |
| Residual                                                           |                 | 21.46                 | 4.63                  |                       |

## References

1. Hofstede, G. Dimensionalizing cultures: The Hofstede model in context. *Online Read. Psychol. Cult.* **2**, 8 (2011).
2. Inglehart, R. & Welzel, C. *Modernization, Cultural Change, and Democracy: The Human Development Sequence*. (Cambridge University Press, 2005).
3. Gelfand, M. J. *et al.* Differences between tight and loose cultures: A 33-nation study. *Science* **332**, 1100–1104 (2011).
4. Haerpfer, C. *et al.* *World Values Survey: Round Seven – Country-Pooled Datafile*. (JD Systems Institute & WVSA Secretariat, 2020).
5. OECD. *Trust in Government*.  
<https://www.oecd.org/en/data/indicators/trust-in-government.html> (2024).
6. World Bank. GINI Index (World Bank Estimate). (2024).
7. World Bank. GDP per Capita (Current US\$). (2024).
8. World Bank. *Worldwide Governance Indicators*.  
<https://databank.worldbank.org/source/worldwide-governance-indicators#> (2024).
9. Adler, N. E., Epel, E. S., Castellazzo, G. & Ickovics, J. R. Relationship of subjective and objective social status with psychological and physiological functioning: Preliminary data in healthy, White women. *Health Psychol.* **19**, 586 (2000).
